# Supplementary material for: Extracellularly synthesized ZnO nanoparticles interact with DNA and augment gamma radiation induced DNA damage through reactive oxygen species
Source: Royal Society of Chemistry journal article supplement (doi:10.1039/c5ra09935h), 2015-01-01

### Supplementary data

**Supplementary figure 1:** UV-Visible absorption spectra of ZnONPs (a) before calcination (b) after calcination (at 500°C for 1 hr).

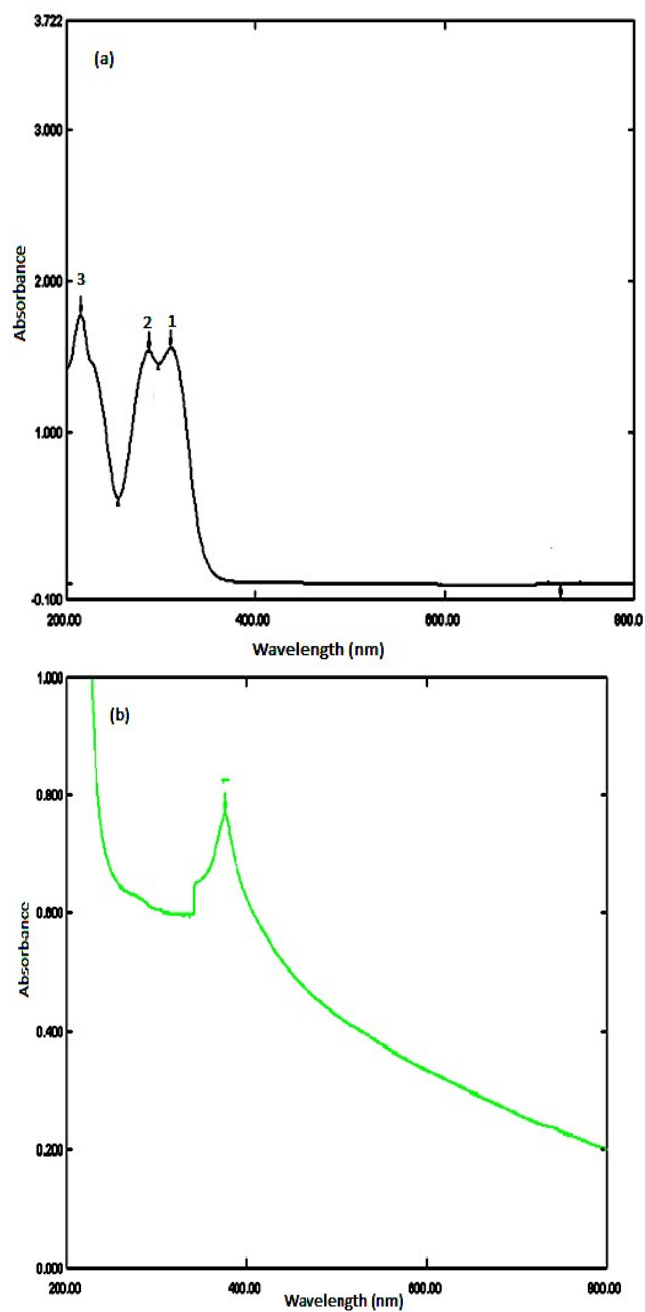

**Supplementary figure 2:** Photoluminescence spectra of ZnONPs with excitation at 325 nm (a) before calcination (b) after calcination (500°C for 1 hr).

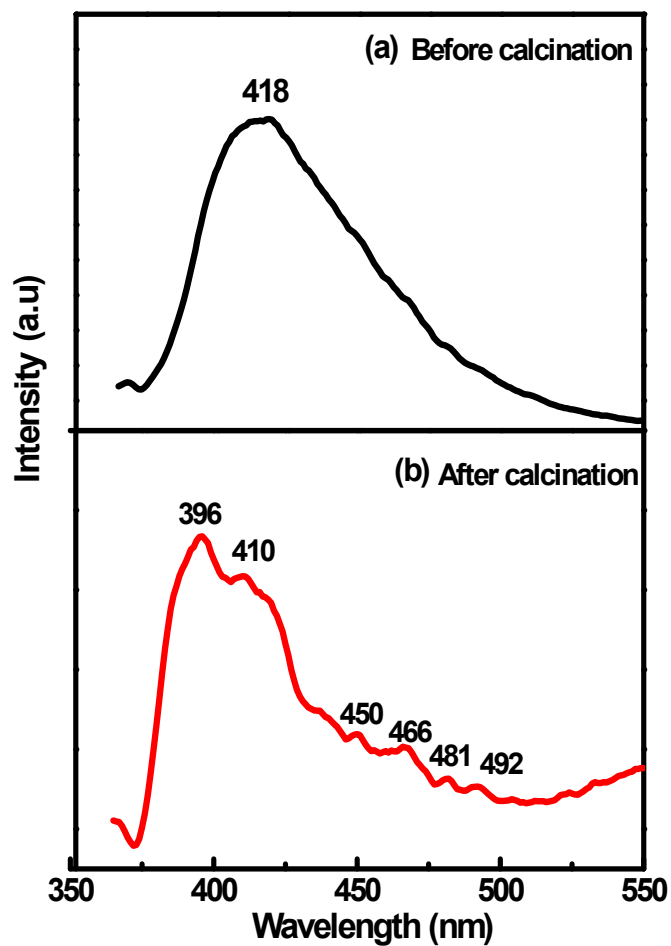

**Supplementary figure 3:** Thermal characteristics of ZnONPs were analyzed by thermogravimetry and differential scanning calorimetry (a) before calcination (b) after calcination

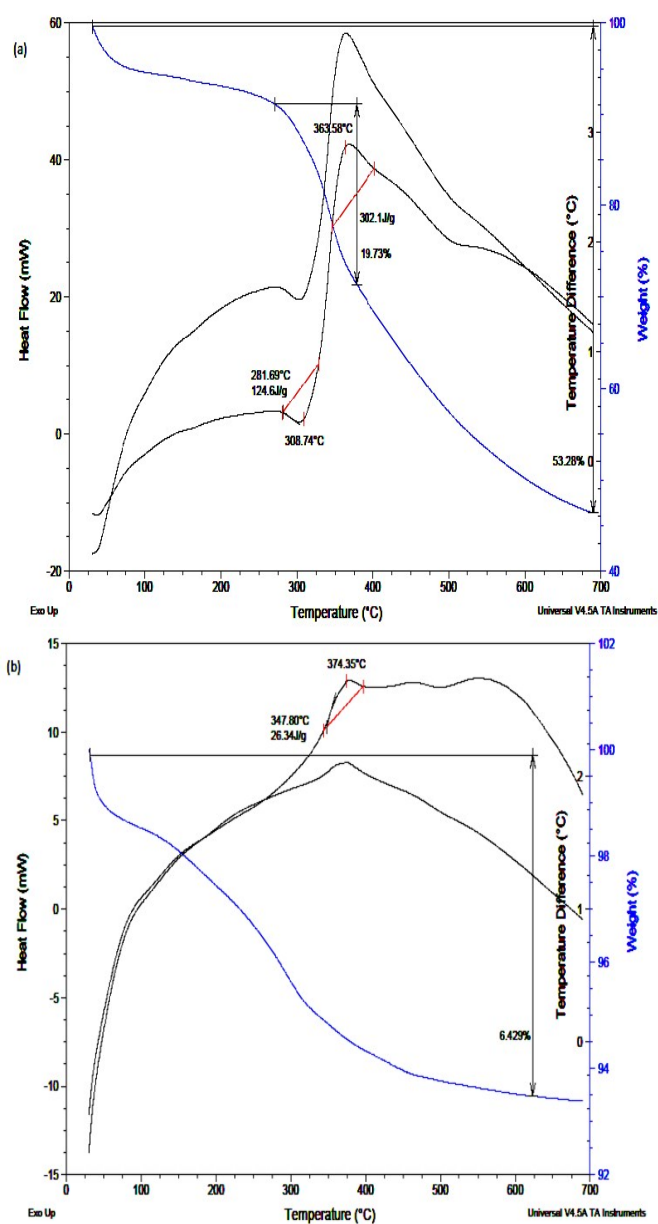

**Supplementary figure 4:** Absorption spectra for gamma irradiated CT- DNA alone (0.1 mM in Tris HCl buffer, pH 7.5) and in presence of varying concentration of ZnONPs (0 – 50  $\mu\text{g/ml}$ ). The arrow shows the change of spectra upon increasing concentration of ZnONPs (1) DNA alone, (2) DNA + 10  $\mu\text{g/ml}$  ZnONPs , (3) DNA + 30  $\mu\text{g/ml}$  ZnONPs, (4) DNA + 50  $\mu\text{g/ml}$  ZnONPs.

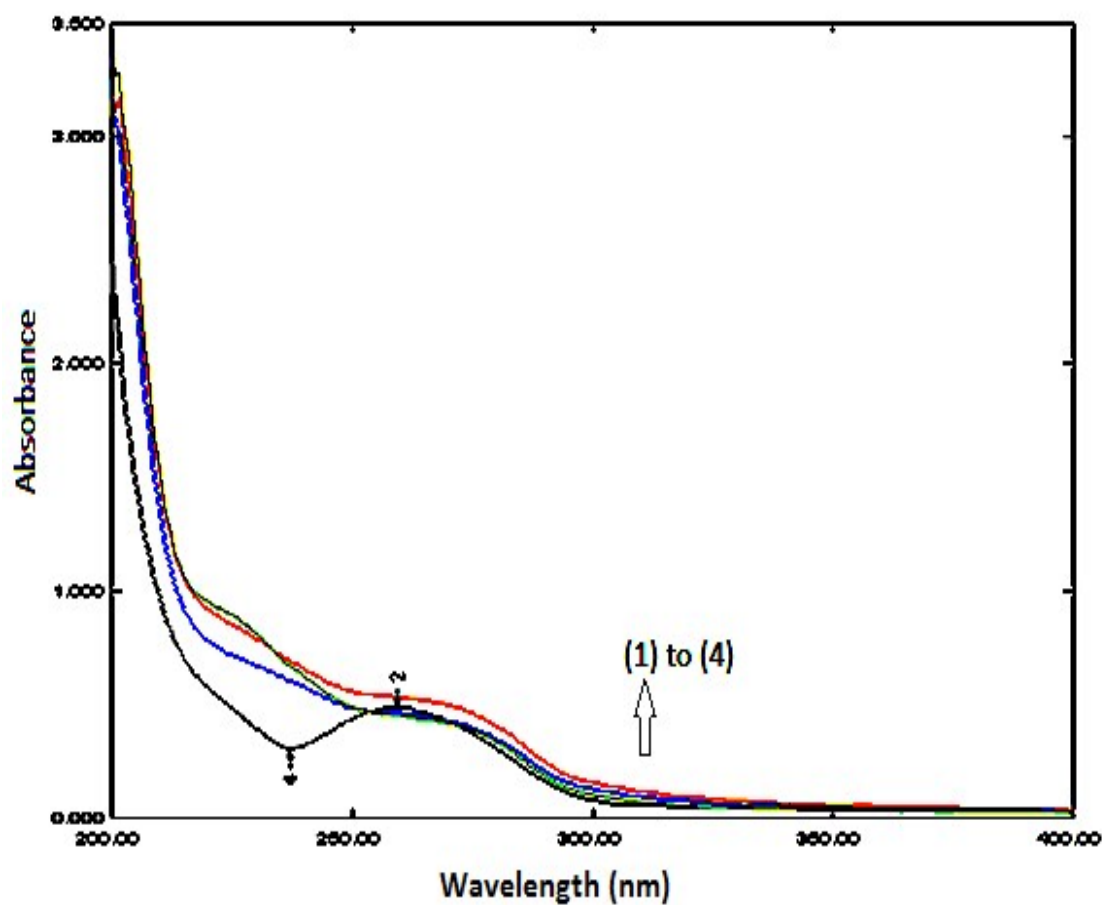

**Supplementary figure 5:** Photoluminescence spectra of ZnONPs with excitation at 325 nm (a) Before radiation ( b) After radiation.

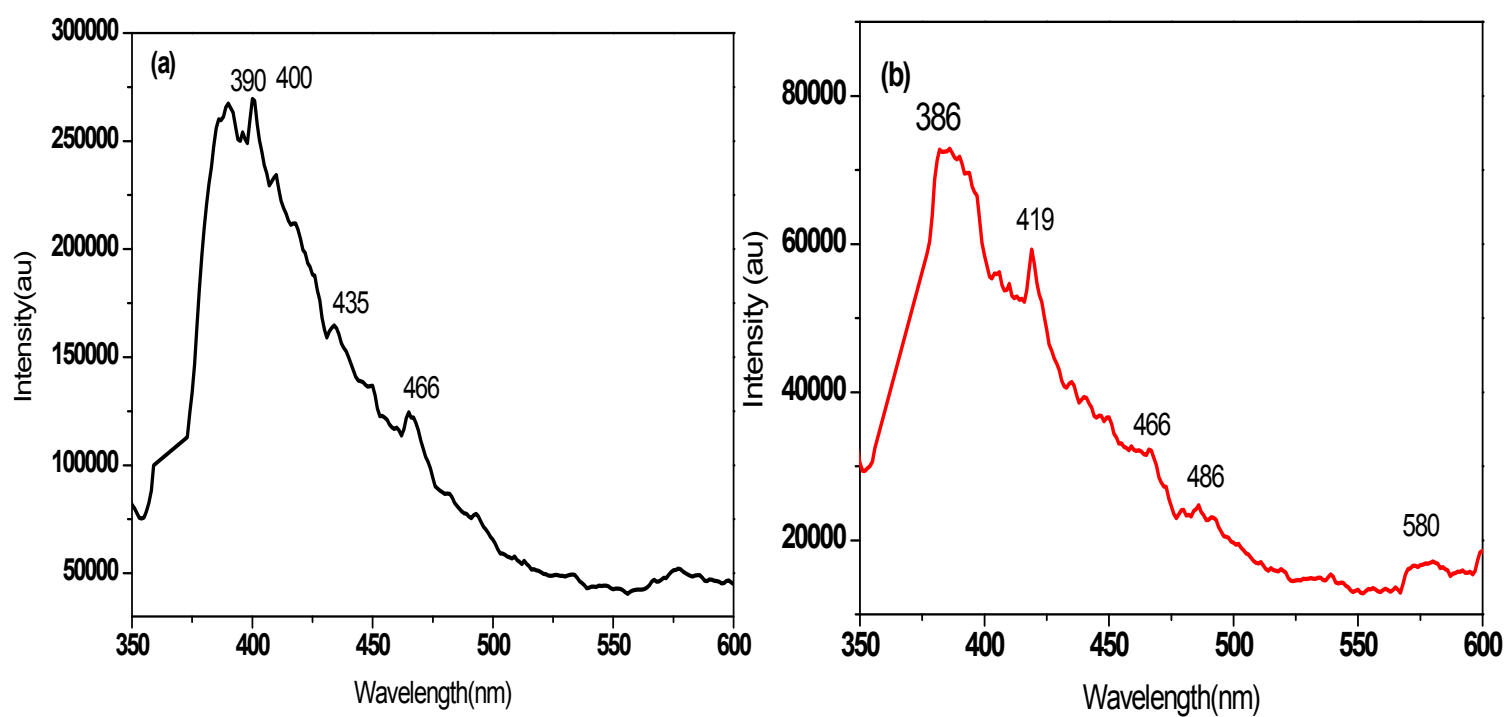

Supplement: c5ra09935h1.pdf [file c5ra09935h1.pdf]
